# Supplementary material for: Epigenetic Marks, DNA Damage Markers, or Both? The Impact of Desiccation and Accelerated Aging on Nucleobase Modifications in Plant Genomic DNA
Source: MDPI journal article supplement (doi:10.3390/cells11111748), 2022-05-25
Supplement: s1 [file s1]

Table S1: Table of coordinates of variables used in principal component analysis.

| <b>Treatment</b>  | <b>Dim.1</b> | <b>Dim.2</b> | <b>Dim.3</b> | <b>Dim.4</b> | <b>Dim.5</b> |
|-------------------|--------------|--------------|--------------|--------------|--------------|
| 8-oxoG            | 0.57203      | -0.70221     | 0.290405     | -0.29132     | -0.0405      |
| hm <sup>5</sup> C | -0.24924     | -0.80787     | -0.53045     | 0.01204      | 0.040057     |
| m <sup>5</sup> C  | -0.95521     | 0.030831     | 0.052684     | 0.098291     | -0.20248     |
| ROS               | 0.764997     | -0.47281     | 0.31759      | 0.27463      | -0.01285     |
| TAC               | -0.93183     | -0.01832     | 0.204887     | -0.03055     | 0.279445     |
| NPAC              | -0.94239     | -0.00741     | 0.091445     | -0.2503      | -0.08704     |
| RG                | -0.93477     | -0.29882     | 0.085611     | 0.0937       | -0.04589     |
| TTC               | -0.91495     | -0.31488     | 0.146278     | 0.134775     | 0.01635      |
