# Supplementary material for: Epigenetic Marks, DNA Damage Markers, or Both? The Impact of Desiccation and Accelerated Aging on Nucleobase Modifications in Plant Genomic DNA
Source: MDPI journal article supplement (doi:10.3390/cells11111748), 2022-05-25
Supplement: s1 [file s1]

Table S2: Table of loadings matrix of variables used in principal component analysis.

| <b>Treatment</b>  | <b>Dim.1</b> | <b>Dim.2</b> | <b>Dim.3</b> | <b>Dim.4</b> | <b>Dim.5</b> |
|-------------------|--------------|--------------|--------------|--------------|--------------|
| 8-oxoG            | 6.111309     | 31.62745     | 15.37786     | 32.56347     | 1.238188     |
| hm <sup>5</sup> C | 1.160185     | 41.86123     | 51.30706     | 0.055621     | 1.211469     |
| m <sup>5</sup> C  | 17.04093     | 0.060967     | 0.506117     | 3.706983     | 30.95564     |
| ROS               | 10.92989     | 14.33857     | 18.3916      | 28.93924     | 0.124741     |
| TAC               | 16.21679     | 0.021534     | 7.65452      | 0.358023     | 58.95858     |
| NPAC              | 16.58673     | 0.003521     | 1.524794     | 24.03825     | 5.719585     |
| RG                | 16.31951     | 5.727408     | 1.336421     | 3.368794     | 1.589961     |
| TTC               | 15.63465     | 6.359318     | 3.901624     | 6.969616     | 0.201836     |
